# Supplementary material for: Effects of broad-spectrum antibiotics on the colonisation of probiotic yeast Saccharomyces boulardii in the murine gastrointestinal tract
Source: PubMed Central journal article supplement (PMC9133042; doi:10.1038/s41598-022-12806-0), 2022-05-25
Supplement: 41598_2022_12806_MOESM1_ESM.pdf [file 41598_2022_12806_MOESM1_ESM.pdf]

Supplemental Material for:

**Effects of broad-spectrum antibiotics on the colonisation of probiotic yeast *Saccharomyces boulardii* in the murine gastrointestinal tract**

Karl Alex Hedin<sup>1</sup>, Vanessa Emily Rees<sup>1</sup>, Hongbin Zhang<sup>1</sup>, Vibeke Kruse<sup>1</sup>, Ruben Vazquez-Urbe<sup>1,\*</sup>, Morten Otto Alexander Sommer<sup>1,\*</sup>

1. Novo Nordisk Foundation Center for Biosustainability, Technical University of Denmark, DK2800 Kgs. Lyngby, Denmark

\*Corresponding authors

Morten O.A. Sommer (msom@bio.dtu.dk)

Ruben Vazquez-Urbe (ruvas@biosustain.dtu.dk)

## Supplementary Figures

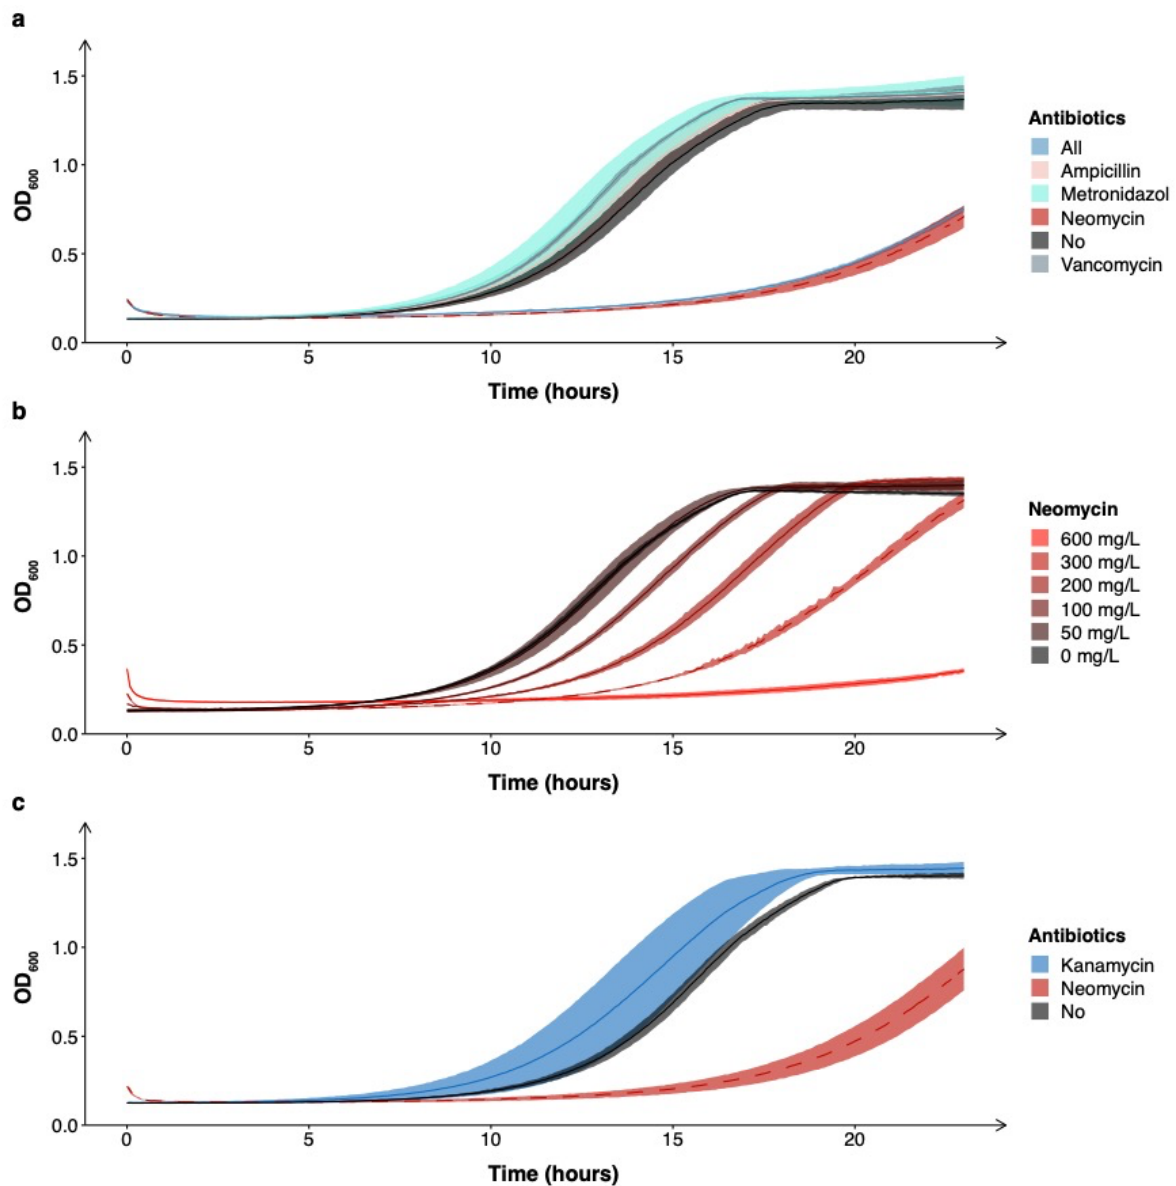

**Figure S1. Growth performance on the antibiotics used in the antibiotic cocktail.** (a) Individually and combined growth assessment on 300 mg/L ampicillin, 300 mg/L metronidazole, 300 mg/L neomycin and 150 mg/L vancomycin. (b) Growth assessment on a gradient of neomycin concentration. (c) Growth assessment on 300 mg/L kanamycin. Mean OD was obtained from four biological replicates  $\pm$  SD monitored with microplate reader Synergy™ H1 BioTek.

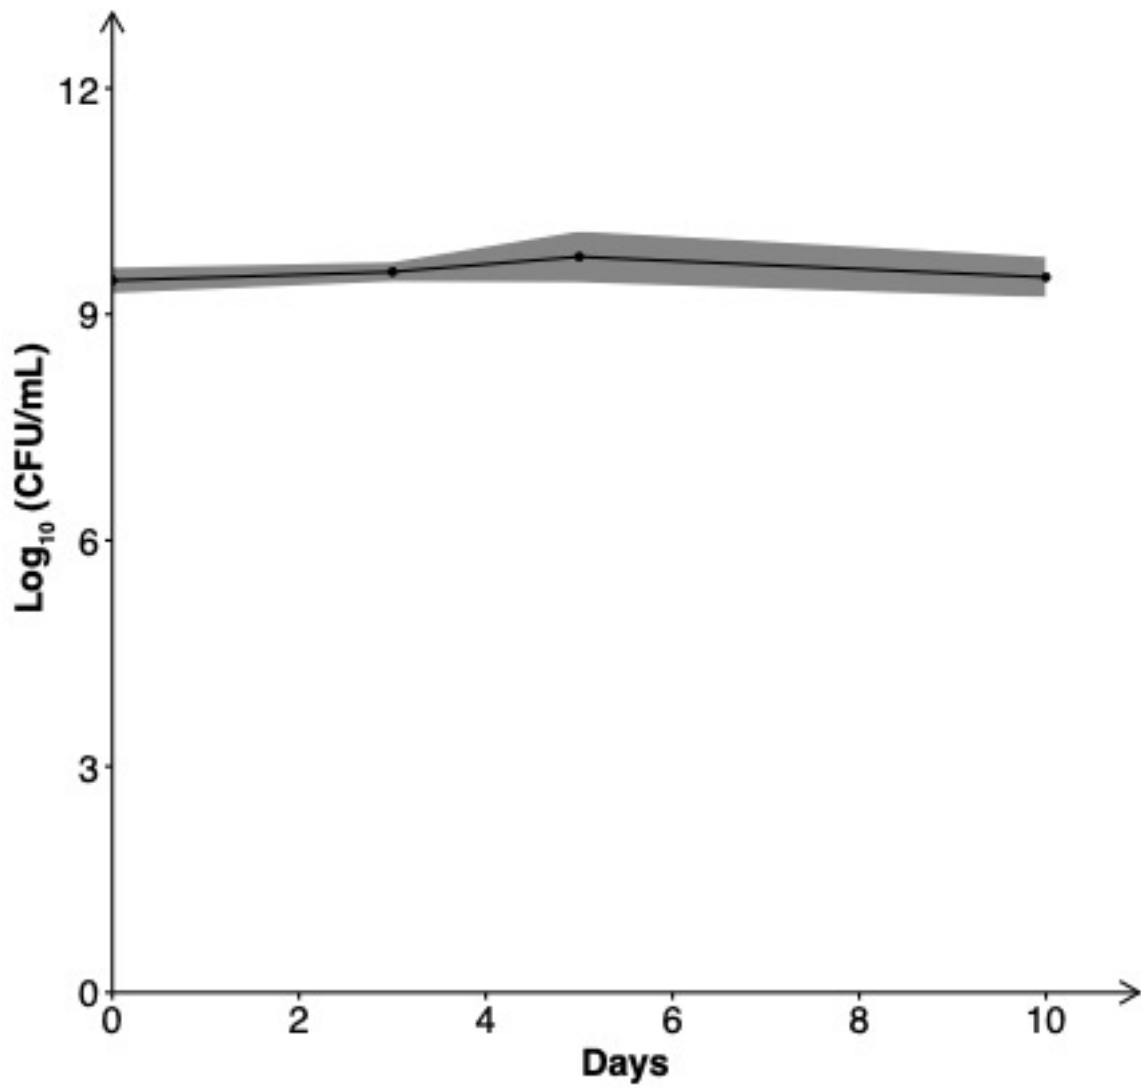

**Figure S2.** CFU assessment of *S. boulardii* at -80 °C over time. Line plot of the counted CFU per mL of *S. boulardii* in the cryovials for day 0, 3, 5 and 10.

## Supplementary Tables

**Table S1. Oligonucleotides used in this study**

| Oligo Name   | Sequence                          | Reference(s) |
|--------------|-----------------------------------|--------------|
| p2055_GFP_fw | AGACAACCUGAAGTCTAGGTCCCTATTTATTTT | This study   |
| p2055_GFP_rv | ATTTTGGAAUGCACGCGATCGCACGCAT      | This study   |
| TEF1p_GFP_fw | ATTCCAAAAUGTTTCTACTCCTTTTTTTA     | This study   |
| TEF1p_GFP_rv | ACATTTTGUAATTA AAACTTAGATTAGA     | This study   |
| GFP_fw       | ACAAAATGUCCAAAGGTGAAGAACTTTT      | This study   |
| GFP_rv       | AGGTTGTCUAACTCCTTCCTTTTCGGT       | This study   |
| X-2_dg_fw    | ATCGCCACTGACCCCATATT              | This study   |
| X-2_dg_rv    | GTCTACTTGT CATAACTCAATTTGCC       | This study   |
| 16S-V7-FW    | GTGGTGCACGGCTGTCGTCA              | [1]          |
| 16S-V7-RV    | ACGTCATCCACACCTTCCTC              |              |
| qPCR_GFP_fw  | TCTGTATCAGGTGAAGGAGAGG            | This study   |
| qPCR_GFP_rv  | GGCATAGCAGACTTAAAGAAG             | This study   |

**Table S2. Strains used in this study**

| Strain             | Genotype           | Marker | Parental strain | Reference  |
|--------------------|--------------------|--------|-----------------|------------|
| SB-ATCC-796        | WT                 | N/A    | NA              | This study |
| Sb KanMX:GFP (X-2) | p2055<br>KanMX:GFP | KanMX  | SB-ATCC-796     | This study |
| SbU                | <i>URA3Δ</i>       | N/A    | SB-ATCC-796     | This study |

**Table S3. Plasmids used in this study**

| Plasmid name | Genotype       | Marker (E.coli / S. cerevisiae) | Reference          |
|--------------|----------------|---------------------------------|--------------------|
| pCfB353      | X-2-loxP-KanMX | Amp / kanMX                     | [2]                |
| pCfB2055     | pCfB2055       | Amp / kanMX                     | pCfB353 derivative |

|                 |                                                                   |             |            |
|-----------------|-------------------------------------------------------------------|-------------|------------|
| pCfB2055-GFP    | pCfB2055; P <sub>TEF1</sub> -GFP-<br>T <sub>CYC1</sub> kanMX      | Amp / kanMX | This study |
| pCfB2312        | CEN6_ARS4 Amp P <sub>TEF1</sub> -<br>Cas9-T <sub>CYC1</sub> kanMX | Amp / kanMX | [3]        |
| pCfB2312 - URA3 | pCfB2312; gRNA- <i>URA3</i>                                       | Amp / kanMX | This study |

## REFERENCE

- [1] Guillen, I. A. *et al.* PCR Conditions for 16S Primers for Analysis of Microbes in the Colon of Rats. (2016) doi:10.7171/jbt.16-2703-002.
- [2] Jensen, N. B. *et al.* EasyClone: method for iterative chromosomal integration of multiple genes *Saccharomyces cerevisiae*. *FEMS Yeast Research* **14**, 238–248 (2014).
- [3] Jessop-Fabre, M. M. *et al.* EasyClone-MarkerFree: A vector toolkit for marker-less integration of genes into *Saccharomyces cerevisiae* via CRISPR-Cas9. *Biotechnology Journal* **11**, 1110–1117 (2016).
